# Supplementary material for: The temporal correlation between positive testing and death in Italy: from the first phase to the later evolution of the COVID-19 pandemic
Source: bioRxiv or medRxiv preprint supplement (doi:10.1101/2021.07.14.21260505), 2021-07-15
Supplement: Supplementary file [file media-1.pdf]

## **The temporal correlation between positive testing and death in Italy: from the first phase to the later evolution of the COVID-19 pandemic**

Vincenzo d'Alessandro<sup>1,§</sup>, Nicole Balasco<sup>2,§</sup>, Pietro Ferrara<sup>3,\*</sup>, Luigi Vitagliano<sup>2</sup>

<sup>1</sup>Department of Electrical Engineering and Information Technology, University Federico II, Naples, Italy.

<sup>2</sup>Institute of Biostructures and Bioimaging, CNR, Naples, Italy.

<sup>3</sup>Center for Public Health Research, University of Milan – Bicocca, Monza, Italy. Value-based Healthcare Unit, IRCCS MultiMedica, Sesto San Giovanni, Milan, Italy.

<sup>§</sup>Joint first authors

\* Correspondence should be addressed to Pietro Ferrara, MD, Center for Public Health Research, University of Milan – Bicocca, Via Cadore 48, I-20900 Monza, Italy; Phone +39 (0)39-2333097/8; Email: p\_ferrara@alice.it

### **Supplementary Material**

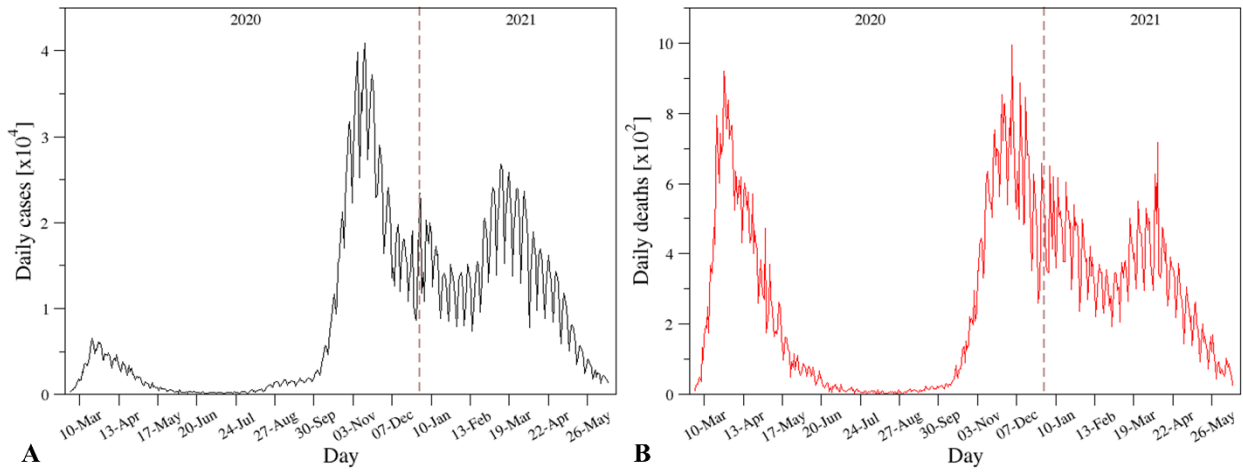

**Figure S1.** Daily evolutions of (A) cases (positive tests) and (B) deaths in the time interval March 2<sup>nd</sup>, 2020 - June 13<sup>th</sup>, 2021.

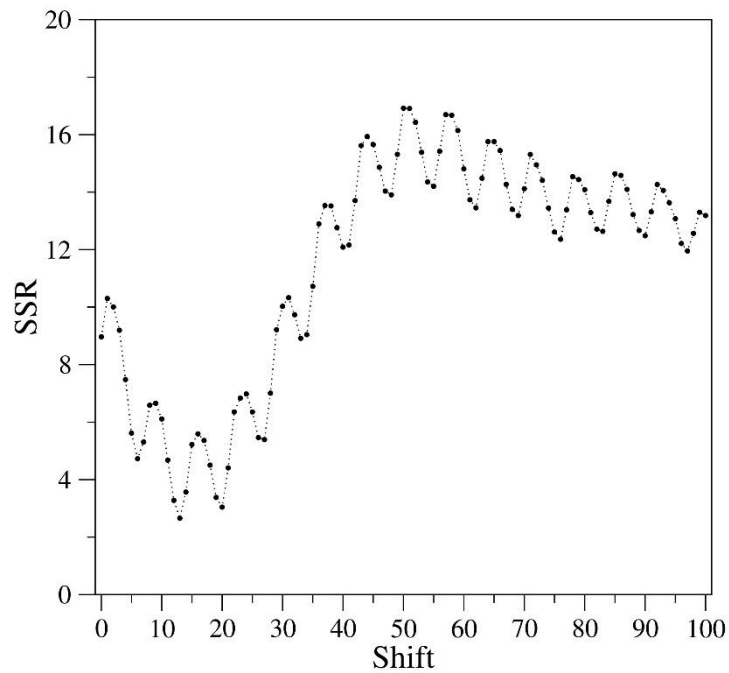

**Figure S2.** Sum of squared residuals (SSR) as a function of day shift of the curves in Phase 2 ( $W_{32}$ - $W_{67}$ ). The normalized curve of the daily cases is shifted ahead with respect to the normalized curve of the daily deaths.

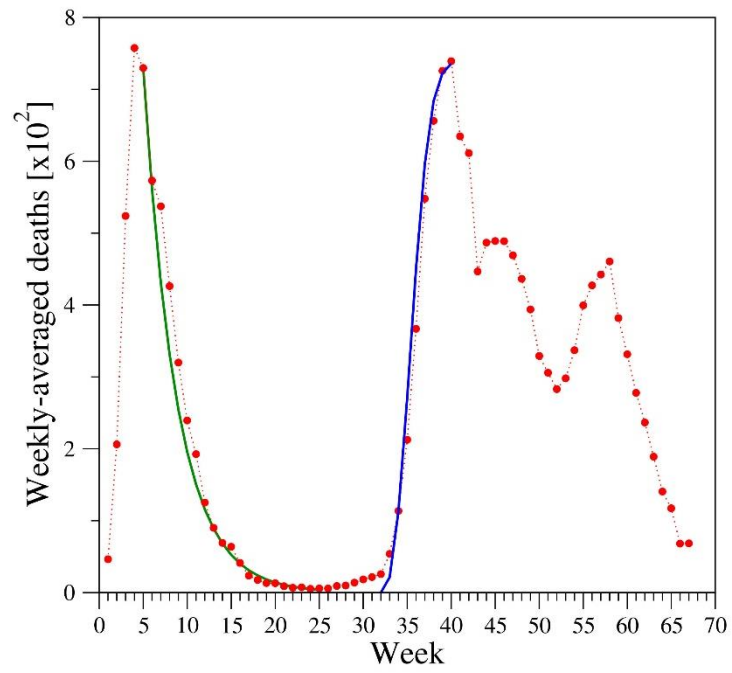

**Figure S3.** Modeling of the lockdown-driven fall of Phase 1 and the rise of Subphase 2.1 of the curve of deaths with a decreasing exponential (time constant 3.8) and a sigmoidal (exponent 2.5 and time constant 4.1) function, respectively.

**Table S1.** Daily cases, deaths, and tests in the time interval March 2<sup>nd</sup>, 2020 - June 13<sup>th</sup>, 2021 collected from the Reports of the Italian National Institute of Health (ISS).

| <b>Date</b> | <b>Daily cases</b> | <b>Daily deaths</b> | <b>Daily tests</b> |
|-------------|--------------------|---------------------|--------------------|
| 02-Mar      | 335                | 11                  | 2218               |
| 03-Mar      | 466                | 27                  | 2511               |
| 04-Mar      | 587                | 28                  | 3981               |
| 05-Mar      | 769                | 41                  | 2525               |
| 06-Mar      | 778                | 49                  | 3997               |
| 07-Mar      | 1247               | 36                  | 5703               |
| 08-Mar      | 1492               | 133                 | 7875               |
| 09-Mar      | 1797               | 97                  | 3889               |
| 10-Mar      | 1577               | 168                 | 6935               |
| 11-Mar      | 1713               | 196                 | 12393              |
| 12-Mar      | 2651               | 189                 | 12857              |
| 13-Mar      | 2547               | 250                 | 11477              |
| 14-Mar      | 3497               | 175                 | 11682              |
| 15-Mar      | 3590               | 368                 | 15729              |
| 16-Mar      | 3385               | 349                 | 13063              |
| 17-Mar      | 3374               | 345                 | 10695              |
| 18-Mar      | 4207               | 475                 | 16884              |
| 19-Mar      | 5322               | 427                 | 17236              |
| 20-Mar      | 5986               | 627                 | 24109              |
| 21-Mar      | 6557               | 793                 | 26336              |
| 22-Mar      | 5560               | 651                 | 25180              |
| 23-Mar      | 4790               | 601                 | 17066              |
| 24-Mar      | 5249               | 743                 | 21496              |
| 25-Mar      | 5210               | 683                 | 27481              |
| 26-Mar      | 6153               | 712                 | 36615              |
| 27-Mar      | 5909               | 919                 | 33019              |
| 28-Mar      | 5974               | 889                 | 35447              |
| 29-Mar      | 5217               | 756                 | 24504              |
| 30-Mar      | 4050               | 812                 | 23329              |
| 31-Mar      | 4053               | 837                 | 29609              |
| 01-Apr      | 4782               | 727                 | 34455              |
| 02-Apr      | 4668               | 760                 | 39809              |
| 03-Apr      | 4585               | 766                 | 38617              |
| 04-Apr      | 4805               | 681                 | 37375              |
| 05-Apr      | 4316               | 525                 | 34237              |
| 06-Apr      | 3599               | 636                 | 30271              |
| 07-Apr      | 3039               | 604                 | 33713              |
| 08-Apr      | 3836               | 542                 | 51680              |
| 09-Apr      | 4204               | 610                 | 46244              |
| 10-Apr      | 3951               | 570                 | 53495              |
| 11-Apr      | 4694               | 619                 | 56609              |
| 12-Apr      | 4092               | 431                 | 46720              |

|        |      |     |       |
|--------|------|-----|-------|
| 13-Apr | 3153 | 566 | 36717 |
| 14-Apr | 2972 | 602 | 26779 |
| 15-Apr | 2667 | 578 | 43715 |
| 16-Apr | 3786 | 525 | 60999 |
| 17-Apr | 3493 | 575 | 65705 |
| 18-Apr | 3491 | 482 | 61725 |
| 19-Apr | 3047 | 433 | 50708 |
| 20-Apr | 2256 | 454 | 41483 |
| 21-Apr | 2729 | 570 | 52126 |
| 22-Apr | 3370 | 401 | 63101 |
| 23-Apr | 2646 | 464 | 66658 |
| 24-Apr | 3021 | 420 | 62447 |
| 25-Apr | 2357 | 415 | 65387 |
| 26-Apr | 2324 | 260 | 49916 |
| 27-Apr | 1739 | 333 | 32003 |
| 28-Apr | 2019 | 382 | 57272 |
| 29-Apr | 2086 | 323 | 63827 |
| 30-Apr | 1872 | 285 | 68456 |
| 01-May | 1965 | 269 | 74208 |
| 02-May | 1900 | 474 | 55412 |
| 03-May | 1389 | 174 | 44935 |
| 04-May | 1221 | 195 | 37631 |
| 05-May | 1075 | 236 | 55263 |
| 06-May | 1444 | 369 | 64263 |
| 07-May | 1401 | 274 | 70359 |
| 08-May | 1327 | 243 | 63775 |
| 09-May | 1083 | 194 | 69171 |
| 10-May | 802  | 165 | 51678 |
| 11-May | 744  | 179 | 40740 |
| 12-May | 1402 | 172 | 67003 |
| 13-May | 888  | 195 | 61973 |
| 14-May | 992  | 262 | 71876 |
| 15-May | 789  | 242 | 68176 |
| 16-May | 875  | 153 | 69179 |
| 17-May | 675  | 145 | 60101 |
| 18-May | 451  | 99  | 36406 |
| 19-May | 813  | 162 | 63158 |
| 20-May | 665  | 161 | 67195 |
| 21-May | 642  | 156 | 71679 |
| 22-May | 652  | 130 | 75380 |
| 23-May | 669  | 119 | 72410 |
| 24-May | 531  | 50  | 55824 |
| 25-May | 300  | 92  | 35241 |
| 26-May | 397  | 78  | 57674 |
| 27-May | 584  | 117 | 67324 |

|        |     |     |       |
|--------|-----|-----|-------|
| 28-May | 593 | 70  | 75893 |
| 29-May | 516 | 87  | 72135 |
| 30-May | 416 | 111 | 69342 |
| 31-May | 333 | 75  | 54118 |
| 01-Jun | 200 | 60  | 31394 |
| 02-Jun | 319 | 55  | 52159 |
| 03-Jun | 322 | 71  | 37299 |
| 04-Jun | 177 | 88  | 49953 |
| 05-Jun | 519 | 85  | 65028 |
| 06-Jun | 270 | 72  | 72485 |
| 07-Jun | 197 | 53  | 49478 |
| 08-Jun | 280 | 65  | 27112 |
| 09-Jun | 283 | 79  | 55003 |
| 10-Jun | 202 | 71  | 62699 |
| 11-Jun | 380 | 53  | 62472 |
| 12-Jun | 163 | 56  | 70620 |
| 13-Jun | 347 | 78  | 49750 |
| 14-Jun | 337 | 44  | 56527 |
| 15-Jun | 301 | 26  | 28107 |
| 16-Jun | 210 | 34  | 46882 |
| 17-Jun | 329 | 43  | 77701 |
| 18-Jun | 332 | 66  | 58154 |
| 19-Jun | 251 | 47  | 57541 |
| 20-Jun | 264 | 49  | 54722 |
| 21-Jun | 224 | 24  | 40545 |
| 22-Jun | 221 | 23  | 28972 |
| 23-Jun | 113 | 18  | 40485 |
| 24-Jun | 190 | 30  | 53266 |
| 25-Jun | 296 | 34  | 56061 |
| 26-Jun | 255 | 30  | 52768 |
| 27-Jun | 175 | 8   | 61351 |
| 28-Jun | 174 | 22  | 37346 |
| 29-Jun | 126 | 6   | 27218 |
| 30-Jun | 142 | 23  | 48273 |
| 01-Jul | 182 | 21  | 55366 |
| 02-Jul | 201 | 30  | 53243 |
| 03-Jul | 223 | 15  | 50096 |
| 04-Jul | 235 | 21  | 52011 |
| 05-Jul | 192 | 7   | 37462 |
| 06-Jul | 208 | 8   | 22166 |
| 07-Jul | 137 | 30  | 43219 |
| 08-Jul | 193 | 15  | 50443 |
| 09-Jul | 214 | 12  | 52552 |
| 10-Jul | 276 | 12  | 47953 |

|        |      |    |       |
|--------|------|----|-------|
| 11-Jul | 188  | 7  | 45931 |
| 12-Jul | 234  | 9  | 38259 |
| 13-Jul | 169  | 13 | 23933 |
| 14-Jul | 114  | 17 | 41867 |
| 15-Jul | 162  | 13 | 48449 |
| 16-Jul | 230  | 20 | 50432 |
| 17-Jul | 231  | 11 | 50767 |
| 18-Jul | 249  | 14 | 48265 |
| 19-Jul | 218  | 3  | 35525 |
| 20-Jul | 190  | 13 | 24253 |
| 21-Jul | 128  | 15 | 43110 |
| 22-Jul | 280  | 9  | 49318 |
| 23-Jul | 306  | 10 | 60311 |
| 24-Jul | 252  | 5  | 53334 |
| 25-Jul | 273  | 5  | 51671 |
| 26-Jul | 252  | 5  | 40526 |
| 27-Jul | 170  | 5  | 25551 |
| 28-Jul | 181  | 11 | 48170 |
| 29-Jul | 289  | 6  | 56018 |
| 30-Jul | 382  | 3  | 61858 |
| 31-Jul | 379  | 9  | 60944 |
| 01-Aug | 295  | 5  | 60383 |
| 02-Aug | 238  | 8  | 43269 |
| 03-Aug | 159  | 12 | 24036 |
| 04-Aug | 190  | 5  | 43788 |
| 05-Aug | 384  | 10 | 56451 |
| 06-Aug | 401  | 6  | 58673 |
| 07-Aug | 552  | 3  | 59196 |
| 08-Aug | 347  | 13 | 53298 |
| 09-Aug | 463  | 2  | 37637 |
| 10-Aug | 259  | 4  | 26432 |
| 11-Aug | 412  | 6  | 40642 |
| 12-Aug | 476  | 10 | 52658 |
| 13-Aug | 522  | 6  | 51188 |
| 14-Aug | 574  | 3  | 46723 |
| 15-Aug | 627  | 4  | 53123 |
| 16-Aug | 479  | 4  | 36807 |
| 17-Aug | 320  | 4  | 30666 |
| 18-Aug | 401  | 5  | 53976 |
| 19-Aug | 642  | 7  | 71095 |
| 20-Aug | 840  | 6  | 77442 |
| 21-Aug | 947  | 9  | 71996 |
| 22-Aug | 1071 | 3  | 77674 |
| 23-Aug | 1209 | 7  | 67371 |
| 24-Aug | 952  | 4  | 45914 |

|        |      |    |        |
|--------|------|----|--------|
| 25-Aug | 876  | 4  | 72341  |
| 26-Aug | 1365 | 13 | 93529  |
| 27-Aug | 1409 | 5  | 94024  |
| 28-Aug | 1462 | 9  | 97065  |
| 29-Aug | 1444 | 1  | 99108  |
| 30-Aug | 1365 | 4  | 81723  |
| 31-Aug | 999  | 6  | 58518  |
| 01-Sep | 984  | 8  | 81050  |
| 02-Sep | 1332 | 6  | 102959 |
| 03-Sep | 1402 | 10 | 92790  |
| 04-Sep | 1738 | 11 | 113085 |
| 05-Sep | 1700 | 16 | 107658 |
| 06-Sep | 1303 | 7  | 76856  |
| 07-Sep | 1107 | 12 | 52553  |
| 08-Sep | 1366 | 10 | 92403  |
| 09-Sep | 1434 | 14 | 95990  |
| 10-Sep | 1597 | 10 | 94186  |
| 11-Sep | 1616 | 10 | 98880  |
| 12-Sep | 1499 | 6  | 92706  |
| 13-Sep | 1458 | 7  | 72143  |
| 14-Sep | 1008 | 14 | 45309  |
| 15-Sep | 1229 | 9  | 80517  |
| 16-Sep | 1450 | 12 | 100607 |
| 17-Sep | 1585 | 13 | 101773 |
| 18-Sep | 1906 | 10 | 99839  |
| 19-Sep | 1638 | 24 | 103223 |
| 20-Sep | 1587 | 15 | 83428  |
| 21-Sep | 1349 | 17 | 55862  |
| 22-Sep | 1392 | 14 | 87303  |
| 23-Sep | 1640 | 20 | 103696 |
| 24-Sep | 1786 | 23 | 108019 |
| 25-Sep | 1912 | 20 | 107269 |
| 26-Sep | 1869 | 17 | 104387 |
| 27-Sep | 1766 | 17 | 87714  |
| 28-Sep | 1493 | 16 | 51109  |
| 29-Sep | 1647 | 24 | 90185  |
| 30-Sep | 1851 | 19 | 105236 |
| 01-Oct | 2548 | 24 | 118236 |
| 02-Oct | 2498 | 23 | 120301 |
| 03-Oct | 2844 | 27 | 118932 |
| 04-Oct | 2578 | 18 | 92714  |
| 05-Oct | 2257 | 16 | 60241  |
| 06-Oct | 2676 | 28 | 99742  |
| 07-Oct | 3678 | 31 | 125314 |
| 08-Oct | 4458 | 22 | 128098 |



|        |       |     |        |
|--------|-------|-----|--------|
| 09-Oct | 5372  | 28  | 129471 |
| 10-Oct | 5724  | 29  | 133084 |
| 11-Oct | 5456  | 26  | 104658 |
| 12-Oct | 4616  | 39  | 85442  |
| 13-Oct | 5901  | 41  | 112544 |
| 14-Oct | 7331  | 43  | 152196 |
| 15-Oct | 8803  | 83  | 162932 |
| 16-Oct | 10010 | 55  | 150377 |
| 17-Oct | 10925 | 47  | 165837 |
| 18-Oct | 11704 | 69  | 146541 |
| 19-Oct | 9335  | 73  | 98862  |
| 20-Oct | 10874 | 89  | 144737 |
| 21-Oct | 15198 | 127 | 177848 |
| 22-Oct | 16079 | 136 | 170392 |
| 23-Oct | 19139 | 91  | 182032 |
| 24-Oct | 19644 | 151 | 177669 |
| 25-Oct | 21268 | 128 | 161880 |
| 26-Oct | 17007 | 141 | 124686 |
| 27-Oct | 21991 | 221 | 174398 |
| 28-Oct | 24989 | 205 | 198952 |
| 29-Oct | 26826 | 217 | 201452 |
| 30-Oct | 31082 | 199 | 215085 |
| 31-Oct | 31756 | 297 | 215886 |
| 01-Nov | 29907 | 208 | 183457 |
| 02-Nov | 22250 | 233 | 135731 |
| 03-Nov | 28242 | 353 | 182287 |
| 04-Nov | 30547 | 352 | 211831 |
| 05-Nov | 34498 | 428 | 219884 |
| 06-Nov | 37807 | 446 | 234245 |
| 07-Nov | 39809 | 425 | 231673 |
| 08-Nov | 32614 | 331 | 191144 |
| 09-Nov | 25263 | 356 | 147725 |
| 10-Nov | 35098 | 580 | 217758 |
| 11-Nov | 32960 | 623 | 225640 |
| 12-Nov | 37978 | 636 | 234672 |
| 13-Nov | 40896 | 550 | 254908 |
| 14-Nov | 37253 | 544 | 227695 |
| 15-Nov | 33977 | 546 | 195275 |
| 16-Nov | 27354 | 504 | 152663 |
| 17-Nov | 32188 | 731 | 208458 |
| 18-Nov | 34283 | 753 | 234834 |
| 19-Nov | 36173 | 653 | 250186 |
| 20-Nov | 37239 | 699 | 238077 |
| 21-Nov | 34767 | 692 | 237225 |
| 22-Nov | 28334 | 562 | 188747 |

|        |       |     |        |
|--------|-------|-----|--------|
| 23-Nov | 22925 | 630 | 148945 |
| 24-Nov | 23231 | 853 | 188659 |
| 25-Nov | 25851 | 722 | 230007 |
| 26-Nov | 28993 | 822 | 232711 |
| 27-Nov | 28344 | 827 | 222803 |
| 28-Nov | 26321 | 686 | 225940 |
| 29-Nov | 20647 | 541 | 130524 |
| 30-Nov | 16374 | 672 | 130524 |
| 01-Dec | 19350 | 785 | 182100 |
| 02-Dec | 20703 | 684 | 207143 |
| 03-Dec | 23236 | 993 | 220047 |
| 04-Dec | 24099 | 814 | 212741 |
| 05-Dec | 21052 | 662 | 194984 |
| 06-Dec | 18846 | 564 | 163550 |
| 07-Dec | 13612 | 528 | 111217 |
| 08-Dec | 14733 | 634 | 149232 |
| 09-Dec | 12652 | 499 | 118475 |
| 10-Dec | 16887 | 887 | 171586 |
| 11-Dec | 18550 | 761 | 190416 |
| 12-Dec | 19738 | 649 | 196439 |
| 13-Dec | 17818 | 484 | 152697 |
| 14-Dec | 11965 | 491 | 103584 |
| 15-Dec | 14714 | 846 | 164431 |
| 16-Dec | 17431 | 680 | 199489 |
| 17-Dec | 18136 | 683 | 185320 |
| 18-Dec | 17989 | 674 | 179800 |
| 19-Dec | 16306 | 553 | 176185 |
| 20-Dec | 15104 | 352 | 137420 |
| 21-Dec | 10860 | 415 | 87889  |
| 22-Dec | 13294 | 628 | 157705 |
| 23-Dec | 14521 | 553 | 183864 |
| 24-Dec | 18040 | 505 | 193777 |
| 25-Dec | 19037 | 459 | 152334 |
| 26-Dec | 10429 | 261 | 81564  |
| 27-Dec | 8909  | 305 | 59879  |
| 28-Dec | 8583  | 445 | 68681  |
| 29-Dec | 11212 | 659 | 128740 |
| 30-Dec | 16202 | 575 | 169045 |
| 31-Dec | 23476 | 555 | 186004 |
| 01-Jan | 22205 | 462 | 157524 |
| 02-Jan | 11831 | 364 | 67174  |
| 03-Jan | 14243 | 347 | 102974 |
| 04-Jan | 10797 | 348 | 77993  |
| 05-Jan | 15373 | 649 | 135106 |
| 06-Jan | 20331 | 548 | 121275 |

|        |       |     |        |
|--------|-------|-----|--------|
| 07-Jan | 18016 | 414 | 140267 |
| 08-Jan | 17531 | 620 | 172119 |
| 09-Jan | 19976 | 483 | 139758 |
| 10-Jan | 18625 | 361 | 139758 |
| 11-Jan | 12532 | 448 | 91656  |
| 12-Jan | 14241 | 616 | 141641 |
| 13-Jan | 15771 | 507 | 175429 |
| 14-Jan | 17244 | 522 | 160585 |
| 15-Jan | 16146 | 477 | 273506 |
| 16-Jan | 16309 | 475 | 261404 |
| 17-Jan | 12545 | 377 | 211078 |
| 18-Jan | 8824  | 377 | 158674 |
| 19-Jan | 10494 | 603 | 254070 |
| 20-Jan | 13548 | 524 | 279762 |
| 21-Jan | 14078 | 521 | 267567 |
| 22-Jan | 13633 | 472 | 264728 |
| 23-Jan | 13330 | 488 | 286331 |
| 24-Jan | 11627 | 299 | 216211 |
| 25-Jan | 8552  | 420 | 126931 |
| 26-Jan | 10580 | 541 | 256287 |
| 27-Jan | 15192 | 467 | 293770 |
| 28-Jan | 14361 | 492 | 275579 |
| 29-Jan | 13572 | 477 | 268750 |
| 30-Jan | 12712 | 421 | 298010 |
| 31-Jan | 11252 | 237 | 213364 |
| 01-Feb | 7916  | 329 | 142419 |
| 02-Feb | 9653  | 499 | 244429 |
| 03-Feb | 13186 | 476 | 279307 |
| 04-Feb | 13654 | 421 | 270142 |
| 05-Feb | 14215 | 377 | 270507 |
| 06-Feb | 13441 | 385 | 282407 |
| 07-Feb | 11640 | 270 | 206789 |
| 08-Feb | 7952  | 307 | 144270 |
| 09-Feb | 10621 | 422 | 274263 |
| 10-Feb | 12947 | 336 | 310994 |
| 11-Feb | 15131 | 391 | 292533 |
| 12-Feb | 13899 | 316 | 287619 |
| 13-Feb | 13524 | 311 | 290534 |
| 14-Feb | 11061 | 221 | 205642 |
| 15-Feb | 7333  | 258 | 179278 |
| 16-Feb | 10378 | 336 | 274019 |
| 17-Feb | 12067 | 369 | 294411 |
| 18-Feb | 13753 | 347 | 288458 |
| 19-Feb | 15462 | 348 | 297128 |
| 20-Feb | 14929 | 251 | 306078 |

|        |       |     |        |
|--------|-------|-----|--------|
| 21-Feb | 13439 | 232 | 250986 |
| 22-Feb | 9615  | 274 | 170672 |
| 23-Feb | 13292 | 356 | 303850 |
| 24-Feb | 16409 | 318 | 340247 |
| 25-Feb | 19875 | 308 | 353704 |
| 26-Feb | 20485 | 253 | 325404 |
| 27-Feb | 18901 | 280 | 323047 |
| 28-Feb | 17447 | 192 | 257024 |
| 01-Mar | 13094 | 246 | 170633 |
| 02-Mar | 17039 | 343 | 335983 |
| 03-Mar | 20864 | 347 | 358884 |
| 04-Mar | 22839 | 339 | 339635 |
| 05-Mar | 24028 | 297 | 378463 |
| 06-Mar | 23600 | 307 | 355024 |
| 07-Mar | 20745 | 207 | 271336 |
| 08-Mar | 13878 | 318 | 184684 |
| 09-Mar | 19615 | 376 | 345972 |
| 10-Mar | 22385 | 332 | 361040 |
| 11-Mar | 25639 | 373 | 372217 |
| 12-Mar | 26793 | 380 | 369636 |
| 13-Mar | 26051 | 317 | 372944 |
| 14-Mar | 21300 | 264 | 273966 |
| 15-Mar | 15247 | 354 | 179015 |
| 16-Mar | 20377 | 502 | 369375 |
| 17-Mar | 23025 | 431 | 369084 |
| 18-Mar | 24907 | 423 | 353737 |
| 19-Mar | 25816 | 386 | 364822 |
| 20-Mar | 23718 | 401 | 354480 |
| 21-Mar | 20149 | 300 | 277086 |
| 22-Mar | 13820 | 386 | 169196 |
| 23-Mar | 18744 | 551 | 335189 |
| 24-Mar | 21239 | 460 | 363767 |
| 25-Mar | 23798 | 460 | 349472 |
| 26-Mar | 23982 | 457 | 354982 |
| 27-Mar | 23839 | 380 | 357154 |
| 28-Mar | 19611 | 297 | 272630 |
| 29-Mar | 12954 | 417 | 156692 |
| 30-Mar | 16000 | 529 | 301451 |
| 31-Mar | 22439 | 467 | 351221 |
| 01-Apr | 23634 | 501 | 356085 |
| 02-Apr | 21918 | 481 | 331154 |
| 03-Apr | 21253 | 376 | 359214 |
| 04-Apr | 18025 | 326 | 250933 |
| 05-Apr | 10676 | 296 | 102795 |
| 06-Apr | 7745  | 421 | 112962 |

|        |       |     |        |
|--------|-------|-----|--------|
| 07-Apr | 13696 | 627 | 339939 |
| 08-Apr | 17207 | 487 | 362162 |
| 09-Apr | 18922 | 718 | 349003 |
| 10-Apr | 17558 | 344 | 334862 |
| 11-Apr | 15737 | 331 | 253100 |
| 12-Apr | 9781  | 358 | 190635 |
| 13-Apr | 13439 | 476 | 304990 |
| 14-Apr | 16157 | 469 | 334766 |
| 15-Apr | 16954 | 380 | 319633 |
| 16-Apr | 15937 | 429 | 327704 |
| 17-Apr | 15364 | 310 | 331734 |
| 18-Apr | 12693 | 251 | 230116 |
| 19-Apr | 8859  | 317 | 146728 |
| 20-Apr | 12066 | 392 | 294045 |
| 21-Apr | 13658 | 365 | 350034 |
| 22-Apr | 16229 | 361 | 364804 |
| 23-Apr | 14758 | 344 | 315700 |
| 24-Apr | 13816 | 324 | 320780 |
| 25-Apr | 13154 | 218 | 239482 |
| 26-Apr | 8438  | 303 | 145819 |
| 27-Apr | 10401 | 374 | 302734 |
| 28-Apr | 13379 | 345 | 336336 |
| 29-Apr | 14319 | 289 | 330075 |
| 30-Apr | 13445 | 264 | 338771 |
| 01-May | 12962 | 226 | 378202 |
| 02-May | 9146  | 144 | 156872 |
| 03-May | 5945  | 256 | 121829 |
| 04-May | 9110  | 305 | 315506 |
| 05-May | 10576 | 267 | 327169 |
| 06-May | 11802 | 258 | 324640 |
| 07-May | 10552 | 207 | 328612 |
| 08-May | 10173 | 224 | 338436 |
| 09-May | 8289  | 139 | 226006 |
| 10-May | 5077  | 198 | 130000 |
| 11-May | 6942  | 251 | 286428 |
| 12-May | 7849  | 262 | 306744 |
| 13-May | 8080  | 201 | 287026 |
| 14-May | 7560  | 182 | 298186 |
| 15-May | 6654  | 136 | 294686 |
| 16-May | 5752  | 93  | 202573 |
| 17-May | 3452  | 140 | 118924 |
| 18-May | 4446  | 201 | 262864 |
| 19-May | 5501  | 149 | 287256 |
| 20-May | 5738  | 164 | 251037 |
| 21-May | 5215  | 133 | 269744 |

|        |      |     |        |
|--------|------|-----|--------|
| 22-May | 4715 | 125 | 286603 |
| 23-May | 3994 | 72  | 179391 |
| 24-May | 2486 | 110 | 107481 |
| 25-May | 3222 | 166 | 252646 |
| 26-May | 3933 | 121 | 260962 |
| 27-May | 4146 | 171 | 243967 |
| 28-May | 3738 | 126 | 249911 |
| 29-May | 3350 | 83  | 247330 |
| 30-May | 2947 | 44  | 164495 |
| 31-May | 1820 | 82  | 86977  |
| 01-Jun | 2482 | 93  | 221818 |
| 02-Jun | 2892 | 62  | 226272 |
| 03-Jun | 1967 | 59  | 97633  |
| 04-Jun | 2555 | 73  | 220939 |
| 05-Jun | 2436 | 57  | 238632 |
| 06-Jun | 2272 | 51  | 149958 |
| 07-Jun | 1271 | 65  | 84567  |
| 08-Jun | 1895 | 102 | 220917 |
| 09-Jun | 2198 | 77  | 218738 |
| 10-Jun | 2070 | 88  | 188120 |
| 11-Jun | 1900 | 69  | 217610 |
| 12-Jun | 1723 | 52  | 212966 |
| 13-Jun | 1390 | 26  | 134136 |

**Table S2.** Week definition with starting and ending date.

| <b>Week</b>     | <b>Starting Date</b> | <b>Ending Date</b> |
|-----------------|----------------------|--------------------|
| W <sub>1</sub>  | 02/03/2020           | 08/03/2020         |
| W <sub>2</sub>  | 09/03/2020           | 15/03/2020         |
| W <sub>3</sub>  | 16/03/2020           | 22/03/2020         |
| W <sub>4</sub>  | 23/03/2020           | 29/03/2020         |
| W <sub>5</sub>  | 30/03/2020           | 05/04/2020         |
| W <sub>6</sub>  | 06/04/2020           | 12/04/2020         |
| W <sub>7</sub>  | 13/04/2020           | 19/04/2020         |
| W <sub>8</sub>  | 20/04/2020           | 26/04/2020         |
| W <sub>9</sub>  | 27/04/2020           | 03/05/2020         |
| W <sub>10</sub> | 04/05/2020           | 10/05/2020         |
| W <sub>11</sub> | 11/05/2020           | 17/05/2020         |
| W <sub>12</sub> | 18/05/2020           | 24/05/2020         |
| W <sub>13</sub> | 25/05/2020           | 31/05/2020         |
| W <sub>14</sub> | 01/06/2020           | 07/06/2020         |
| W <sub>15</sub> | 08/06/2020           | 14/06/2020         |
| W <sub>16</sub> | 15/06/2020           | 21/06/2020         |
| W <sub>17</sub> | 22/06/2020           | 28/06/2020         |
| W <sub>18</sub> | 29/06/2020           | 05/07/2020         |
| W <sub>19</sub> | 06/07/2020           | 12/07/2020         |
| W <sub>20</sub> | 13/07/2020           | 19/07/2020         |
| W <sub>21</sub> | 20/07/2020           | 26/07/2020         |
| W <sub>22</sub> | 27/07/2020           | 02/08/2020         |
| W <sub>23</sub> | 03/08/2020           | 09/08/2020         |
| W <sub>24</sub> | 10/08/2020           | 16/08/2020         |
| W <sub>25</sub> | 17/08/2020           | 23/08/2020         |
| W <sub>26</sub> | 24/08/2020           | 30/08/2020         |
| W <sub>27</sub> | 31/08/2020           | 06/09/2020         |
| W <sub>28</sub> | 07/09/2020           | 13/09/2020         |
| W <sub>29</sub> | 14/09/2020           | 20/09/2020         |
| W <sub>30</sub> | 21/09/2020           | 27/09/2020         |
| W <sub>31</sub> | 28/09/2020           | 04/10/2020         |
| W <sub>32</sub> | 05/10/2020           | 11/10/2020         |
| W <sub>33</sub> | 12/10/2020           | 18/10/2020         |
| W <sub>34</sub> | 19/10/2020           | 25/10/2020         |
| W <sub>35</sub> | 26/10/2020           | 01/11/2020         |
| W <sub>36</sub> | 02/11/2020           | 08/11/2020         |
| W <sub>37</sub> | 09/11/2020           | 15/11/2020         |
| W <sub>38</sub> | 16/11/2020           | 22/11/2020         |

|                 |            |            |
|-----------------|------------|------------|
| W <sub>39</sub> | 23/11/2020 | 29/11/2020 |
| W <sub>40</sub> | 30/11/2020 | 06/12/2020 |
| W <sub>41</sub> | 07/12/2020 | 13/12/2020 |
| W <sub>42</sub> | 14/12/2020 | 20/12/2020 |
| W <sub>43</sub> | 21/12/2020 | 27/12/2020 |
| W <sub>44</sub> | 28/12/2020 | 03/01/2021 |
| W <sub>45</sub> | 04/01/2021 | 10/01/2021 |
| W <sub>46</sub> | 11/01/2021 | 17/01/2021 |
| W <sub>47</sub> | 18/01/2021 | 24/01/2021 |
| W <sub>48</sub> | 25/01/2021 | 31/01/2021 |
| W <sub>49</sub> | 01/02/2021 | 07/02/2021 |
| W <sub>50</sub> | 08/02/2021 | 14/02/2021 |
| W <sub>51</sub> | 15/02/2021 | 21/02/2021 |
| W <sub>52</sub> | 22/02/2021 | 28/02/2021 |
| W <sub>53</sub> | 01/03/2021 | 07/03/2021 |
| W <sub>54</sub> | 08/03/2021 | 14/03/2021 |
| W <sub>55</sub> | 15/03/2021 | 21/03/2021 |
| W <sub>56</sub> | 22/03/2021 | 28/03/2021 |
| W <sub>57</sub> | 29/03/2021 | 04/04/2021 |
| W <sub>58</sub> | 05/04/2021 | 11/04/2021 |
| W <sub>59</sub> | 12/04/2021 | 18/04/2021 |
| W <sub>60</sub> | 19/04/2021 | 25/04/2021 |
| W <sub>61</sub> | 26/04/2021 | 02/05/2021 |
| W <sub>62</sub> | 03/05/2021 | 09/05/2021 |
| W <sub>63</sub> | 10/05/2021 | 16/05/2021 |
| W <sub>64</sub> | 17/05/2021 | 23/05/2021 |
| W <sub>65</sub> | 24/05/2021 | 30/05/2021 |
| W <sub>66</sub> | 31/05/2021 | 06/06/2021 |
| W <sub>67</sub> | 07/06/2021 | 13/06/2021 |



**Table S3.** Cases and deaths *per week* of Phase 1 (blue, W<sub>1</sub>-W<sub>17</sub>) and Phase 2 (green, W<sub>32</sub>-W<sub>67</sub>). Average daily values were obtained dividing the total weekly number of cases/deaths by seven.

| <b>Week</b>     | <b>Average number of cases</b> | <b>Average number of deaths</b> |
|-----------------|--------------------------------|---------------------------------|
| W <sub>1</sub>  | 811                            | 46                              |
| W <sub>2</sub>  | 2482                           | 206                             |
| W <sub>3</sub>  | 4913                           | 524                             |
| W <sub>4</sub>  | 5500                           | 758                             |
| W <sub>5</sub>  | 4466                           | 730                             |
| W <sub>6</sub>  | 3916                           | 573                             |
| W <sub>7</sub>  | 3230                           | 537                             |
| W <sub>8</sub>  | 2672                           | 426                             |
| W <sub>9</sub>  | 1853                           | 320                             |
| W <sub>10</sub> | 1193                           | 239                             |
| W <sub>11</sub> | 909                            | 193                             |
| W <sub>12</sub> | 632                            | 125                             |
| W <sub>13</sub> | 448                            | 90                              |
| W <sub>14</sub> | 286                            | 69                              |
| W <sub>15</sub> | 285                            | 64                              |
| W <sub>16</sub> | 273                            | 41                              |
| W <sub>17</sub> | 203                            | 24                              |
| W <sub>18</sub> | 186                            | 18                              |
| W <sub>19</sub> | 207                            | 13                              |
| W <sub>20</sub> | 196                            | 13                              |
| W <sub>21</sub> | 240                            | 9                               |
| W <sub>22</sub> | 276                            | 7                               |
| W <sub>23</sub> | 357                            | 7                               |
| W <sub>24</sub> | 478                            | 5                               |
| W <sub>25</sub> | 776                            | 6                               |
| W <sub>26</sub> | 1268                           | 6                               |
| W <sub>27</sub> | 1351                           | 9                               |
| W <sub>28</sub> | 1440                           | 10                              |
| W <sub>29</sub> | 1486                           | 14                              |
| W <sub>30</sub> | 1673                           | 18                              |
| W <sub>31</sub> | 2208                           | 22                              |
| W <sub>32</sub> | 4232                           | 26                              |
| W <sub>33</sub> | 8470                           | 54                              |
| W <sub>34</sub> | 15934                          | 114                             |
| W <sub>35</sub> | 26223                          | 213                             |
| W <sub>36</sub> | 32252                          | 367                             |
| W <sub>37</sub> | 34775                          | 548                             |
| W <sub>38</sub> | 32905                          | 656                             |
| W <sub>39</sub> | 25187                          | 726                             |
| W <sub>40</sub> | 20523                          | 739                             |

|                 |       |     |
|-----------------|-------|-----|
| W <sub>41</sub> | 16284 | 635 |
| W <sub>42</sub> | 15949 | 611 |
| W <sub>43</sub> | 13584 | 447 |
| W <sub>44</sub> | 15393 | 487 |
| W <sub>45</sub> | 17236 | 489 |
| W <sub>46</sub> | 14970 | 489 |
| W <sub>47</sub> | 12219 | 469 |
| W <sub>48</sub> | 12317 | 436 |
| W <sub>49</sub> | 11958 | 394 |
| W <sub>50</sub> | 12162 | 329 |
| W <sub>51</sub> | 12480 | 306 |
| W <sub>52</sub> | 16575 | 283 |
| W <sub>53</sub> | 20316 | 298 |
| W <sub>54</sub> | 22237 | 337 |
| W <sub>55</sub> | 21891 | 400 |
| W <sub>56</sub> | 20719 | 427 |
| W <sub>57</sub> | 19460 | 442 |
| W <sub>58</sub> | 14506 | 461 |
| W <sub>59</sub> | 14332 | 382 |
| W <sub>60</sub> | 13220 | 332 |
| W <sub>61</sub> | 11727 | 278 |
| W <sub>62</sub> | 9492  | 237 |
| W <sub>63</sub> | 6845  | 189 |
| W <sub>64</sub> | 4723  | 141 |
| W <sub>65</sub> | 3403  | 117 |
| W <sub>66</sub> | 2346  | 68  |
| W <sub>67</sub> | 1778  | 68  |

**Table S4.** Weekly lethality rate (WLR) values with 95% Confidence Intervals (95%CI). The WLR values were calculated applying a 1-week, 2-week, and 3-week shift between positive test and death in the time intervals  $W_1$ - $W_{33}$ ,  $W_{34}$ - $W_{41}$ , and  $W_{42}$ - $W_{67}$ , respectively. WLR values were calculated by dividing the average daily number of deaths of a given week ( $W_i$ ) by the average daily number of cases of one week ( $W_{i-1}$ ), two weeks ( $W_{i-2}$ ), or three weeks ( $W_{i-3}$ ) before.

| Week     | WLR<br>1-week shift |               | Week     | WLR<br>2-week shift |             | Week     | WLR<br>3-week shift |             |
|----------|---------------------|---------------|----------|---------------------|-------------|----------|---------------------|-------------|
|          |                     | 95% CI        |          |                     | 95% CI      |          |                     | 95% CI      |
| $W_2$    | 25.43               | (24.1 – 26.8) | $W_{34}$ | 2.68                | (2.5 – 2.9) | $W_{42}$ | 2.43                | (2.4 – 2.5) |
| $W_3$    | 21.10               | (20.4 – 21.8) | $W_{35}$ | 2.51                | (2.4 – 2.6) | $W_{43}$ | 2.18                | (2.1 – 2.3) |
| $W_4$    | 15.42               | (15.0 – 15.8) | $W_{36}$ | 2.30                | (2.2 – 2.4) | $W_{44}$ | 2.99                | (2.9 – 3.1) |
| $W_5$    | 13.27               | (12.9 – 13.6) | $W_{37}$ | 2.09                | (2.0 – 2.2) | $W_{45}$ | 3.07                | (3.0 – 3.2) |
| $W_6$    | 12.83               | (12.4 – 13.2) | $W_{38}$ | 2.03                | (2.0 – 2.1) | $W_{46}$ | 3.60                | (3.5 – 3.7) |
| $W_7$    | 13.72               | (13.3 – 14.1) | $W_{39}$ | 2.09                | (2.0 – 2.1) | $W_{47}$ | 3.05                | (2.9 – 3.2) |
| $W_8$    | 13.20               | (12.7 – 13.7) | $W_{40}$ | 2.25                | (2.2 – 2.3) | $W_{48}$ | 2.53                | (2.4 – 2.6) |
| $W_9$    | 11.98               | (11.5 – 12.5) | $W_{41}$ | 2.52                | (2.4 – 2.6) | $W_{49}$ | 2.63                | (2.5 – 2.7) |
| $W_{10}$ | 12.92               | (12.3 – 13.6) |          |                     |             | $W_{50}$ | 2.69                | (2.6 – 2.8) |
| $W_{11}$ | 16.14               | (15.3 – 17.0) |          |                     |             | $W_{51}$ | 2.48                | (2.4 – 2.6) |
| $W_{12}$ | 13.78               | (12.9 – 14.7) |          |                     |             | $W_{52}$ | 2.37                | (2.3 – 2.5) |
| $W_{13}$ | 14.24               | (13.2 – 15.4) |          |                     |             | $W_{53}$ | 2.45                | (2.3 – 2.6) |
| $W_{14}$ | 15.42               | (14.1 – 16.9) |          |                     |             | $W_{54}$ | 2.70                | (2.6 – 2.8) |
| $W_{15}$ | 22.25               | (20.2 – 24.4) |          |                     |             | $W_{55}$ | 2.41                | (2.3 – 2.5) |
| $W_{16}$ | 14.51               | (12.9 – 16.3) |          |                     |             | $W_{56}$ | 2.10                | (2.0 – 2.2) |
| $W_{17}$ | 8.63                | (7.4 – 10.1)  |          |                     |             | $W_{57}$ | 1.99                | (1.9 – 2.1) |
| $W_{18}$ | 8.64                | (7.2 – 10.3)  |          |                     |             | $W_{58}$ | 2.10                | (2.0 – 2.2) |
| $W_{19}$ | 7.15                | (5.8 – 8.8)   |          |                     |             | $W_{59}$ | 1.84                | (1.8 – 1.9) |
| $W_{20}$ | 6.28                | (5.1 – 7.7)   |          |                     |             | $W_{60}$ | 1.70                | (1.6 – 1.8) |
| $W_{21}$ | 4.52                | (3.5 – 5.8)   |          |                     |             | $W_{61}$ | 1.92                | (1.8 – 2.0) |
| $W_{22}$ | 2.80                | (2.1 – 3.7)   |          |                     |             | $W_{62}$ | 1.65                | (1.6 – 1.7) |
| $W_{23}$ | 2.64                | (2.0 – 3.5)   |          |                     |             | $W_{63}$ | 1.43                | (1.4 – 1.5) |
| $W_{24}$ | 1.48                | (1.0 – 2.0)   |          |                     |             | $W_{64}$ | 1.20                | (1.1 – 1.3) |
| $W_{25}$ | 1.22                | (0.9 – 1.7)   |          |                     |             | $W_{65}$ | 1.24                | (1.2 – 1.3) |
| $W_{26}$ | 0.74                | (0.5 – 1.0)   |          |                     |             | $W_{66}$ | 1.00                | (0.9 – 1.1) |
| $W_{27}$ | 0.72                | (0.6 – 0.9)   |          |                     |             | $W_{67}$ | 1.45                | (1.3 – 1.6) |
| $W_{28}$ | 0.73                | (0.6 – 0.9)   |          |                     |             |          |                     |             |
| $W_{29}$ | 0.96                | (0.8 – 1.2)   |          |                     |             |          |                     |             |
| $W_{30}$ | 1.23                | (1.0 – 1.5)   |          |                     |             |          |                     |             |
| $W_{31}$ | 1.29                | (1.1 – 1.5)   |          |                     |             |          |                     |             |
| $W_{32}$ | 1.16                | (1.0 – 1.3)   |          |                     |             |          |                     |             |
| $W_{33}$ | 1.27                | (1.1 – 1.4)   |          |                     |             |          |                     |             |
